# Supplementary figures and images for: Structural characterization of naphthalene sulfonamides and a sulfonate ester and their in vitro efficacy against Leishmania tarentolae promastigotes
Source: Royal Society of Chemistry journal article supplement (doi:10.1039/d0nj06320g), 2021-01-01

## Intermolecular Interactions

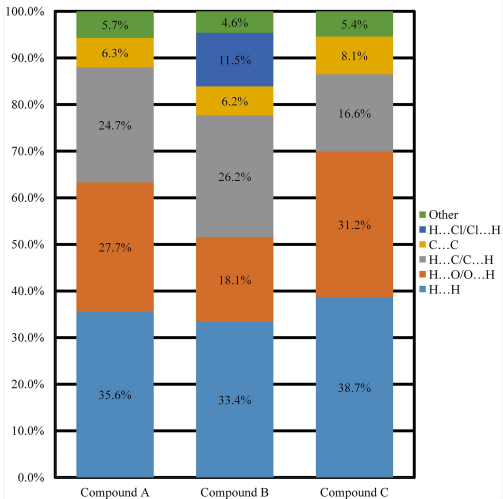

Supplement: d0nj06320g2.pdf [file d0nj06320g2.pdf]
